# Supplementary material
Source: PubMed Central journal article supplement (PMC5601339)
Supplement: AEM.00824-17_zam999118063s1.pdf [file AEM.00824-17_zam999118063s1.pdf]

## 1 Supplemental material

|         |      | $\alpha 1$                            |             |                  |              |           |            |           |           |         |       |       |      |       |      |     |       |       |     |   |   |   |   |   |   |   |   |   |   |   |       |     |       |     |     |
|---------|------|---------------------------------------|-------------|------------------|--------------|-----------|------------|-----------|-----------|---------|-------|-------|------|-------|------|-----|-------|-------|-----|---|---|---|---|---|---|---|---|---|---|---|-------|-----|-------|-----|-----|
| ORF3    | 1:   | MTTSAPITAPTVEPTRTSQTASLGESVAWLPVEGAEP | TGTQSAGSVL  | <b>ETTILRKAF</b> | GCFP         | 60        |            |           |           |         |       |       |      |       |      |     |       |       |     |   |   |   |   |   |   |   |   |   |   |   |       |     |       |     |     |
| HpaC_St | 1:   | -----                                 | -----       | MAEVIKS          | IMRKFP       | 13        |            |           |           |         |       |       |      |       |      |     |       |       |     |   |   |   |   |   |   |   |   |   |   |   |       |     |       |     |     |
| HpaC_Tt | 1:   | -----                                 | -----       | MKEAFKEAL        | ARFA         | 13        |            |           |           |         |       |       |      |       |      |     |       |       |     |   |   |   |   |   |   |   |   |   |   |   |       |     |       |     |     |
| PheA2   | 1:   | -----                                 | -----       | MDDR             | LFERNAMGKFA  | 14        |            |           |           |         |       |       |      |       |      |     |       |       |     |   |   |   |   |   |   |   |   |   |   |   |       |     |       |     |     |
| TftC    | 1:   | -----                                 | MHAGEAVQQLK | KAFETVA          | SFDFRDALSKA  | 30        |            |           |           |         |       |       |      |       |      |     |       |       |     |   |   |   |   |   |   |   |   |   |   |   |       |     |       |     |     |
| CodR    | 1:   | -----                                 | MQTVNNII    | SSVSTVES         | KAYRDAMSHYA  | 27        |            |           |           |         |       |       |      |       |      |     |       |       |     |   |   |   |   |   |   |   |   |   |   |   |       |     |       |     |     |
|         |      | $\beta 1$                             | $\beta 2$   | $\beta 3$        | $\beta 4$    | $\beta 5$ | $\alpha 2$ | $\beta 6$ |           |         |       |       |      |       |      |     |       |       |     |   |   |   |   |   |   |   |   |   |   |   |       |     |       |     |     |
| ORF3    | 61:  | SGVAALCALDPGDEDR                      | PAGIAASSFTS | VSLDPALVSV       | CIHTSTTW     | PRLAGLARV | GVSVL      | 120       |           |         |       |       |      |       |      |     |       |       |     |   |   |   |   |   |   |   |   |   |   |   |       |     |       |     |     |
| HpaC_St | 14:  | LGVAIVTTNWK                           | GEL---      | VGMTVNTFNSLS     | LNPLVSV      | FFADRMKGN | DI         | PYKESKYFV | VNF-      | 69      |       |       |      |       |      |     |       |       |     |   |   |   |   |   |   |   |   |   |   |   |       |     |       |     |     |
| HpaC_Tt | 14:  | SGVTVVAARL                            | GEEE---     | RGMTATAFMS       | LSLEPPLVALAV | SERAKLLP  | VLEGAG     | AFTVSL    | 70        |         |       |       |      |       |      |     |       |       |     |   |   |   |   |   |   |   |   |   |   |   |       |     |       |     |     |
| PheA2   | 15:  | TGVTVITTE                             | LNGAV---    | HGMTANAFMS       | VSLNPKLV     | LSIGEKAK  | MLEKIQ     | SKKYAV    | NIL       | 71      |       |       |      |       |      |     |       |       |     |   |   |   |   |   |   |   |   |   |   |   |       |     |       |     |     |
| TftC    | 31:  | TEVTTVAT                              | NGPFGL---   | AGLTC            | SAVCSVCDR    | PPTVLLC   | INRKS      | YAAGI     | IKSNGVLSV | NWL     | 87    |       |      |       |      |     |       |       |     |   |   |   |   |   |   |   |   |   |   |   |       |     |       |     |     |
| CodR    | 28:  | GAVQIVTT                              | AGAAGR---   | RGLTLTA          | ACSVSDN      | NPTILIC   | LQK        | HEENR     | IFIENG    | VFAINTL | 84    |       |      |       |      |     |       |       |     |   |   |   |   |   |   |   |   |   |   |   |       |     |       |     |     |
|         |      | *                                     | *           | *                | *            | *         | *          | *         | *         | *       | *     | *     |      |       |      |     |       |       |     |   |   |   |   |   |   |   |   |   |   |   |       |     |       |     |     |
|         |      | $\alpha 3$                            | $\alpha 4$  | $\beta 7$        | $\beta 8$    | $\beta 9$ |            |           |           |         |       |       |      |       |      |     |       |       |     |   |   |   |   |   |   |   |   |   |   |   |       |     |       |     |     |
| ORF3    | 121: | AEHHEEVASAL                           | ASK---      | RADRF            | DGIDWAHSAS   | GAVFVHG   | STLWLECA   | IDRTV     | RAGD      | HDI     | 176   |       |      |       |      |     |       |       |     |   |   |   |   |   |   |   |   |   |   |   |       |     |       |     |     |
| HpaC_St | 70:  | TDNEELFN                              | IFALK---    | PVKE             | RFREIKYKE    | GIGGCP    | ILYDSY     | AYIEAK    | LYDTI     | DVGD    | HSI   | 125   |      |       |      |     |       |       |     |   |   |   |   |   |   |   |   |   |   |   |       |     |       |     |     |
| HpaC_Tt | 71:  | REGQEA                                | VSEHF       | AGR---           | PKEG         | IALLEEG   | -----      | RVK       | GALAV     | LRCRL   | HALY  | PGGD  | HRI  | 118   |      |     |       |       |     |   |   |   |   |   |   |   |   |   |   |   |       |     |       |     |     |
| PheA2   | 72:  | SQDQK                                 | VLSMNF      | AGQLE            | KPV          | DVQFEELG  | -----      | GLP       | VIK       | DALAQ   | ISCQ  | VVNEV | QAGD | HTL   | 125  |     |       |       |     |   |   |   |   |   |   |   |   |   |   |   |       |     |       |     |     |
| TftC    | 88:  | AAGQAV                                | ISQTF       | AGVGS            | VPMEE        | RFADK     | GWQ        | T         | IATG      | APYR    | MDAA  | V     | FDCT | IANIV | DVGS | HSV | 147   |       |     |   |   |   |   |   |   |   |   |   |   |   |       |     |       |     |     |
| CodR    | 85:  | AGPHQQL                               | ADAF        | SGRIG            | LTD          | ERFELAA   | WEI        | LATG      | APV       | LK      | GALAA | FDCR  | VV   | SVQD  | HST  | HHV | 144   |       |     |   |   |   |   |   |   |   |   |   |   |   |       |     |       |     |     |
|         |      | *                                     | *           | *                | *            | *         | *          | *         | *         | *       | *     | *     | *    | *     | *    | *   | *     |       |     |   |   |   |   |   |   |   |   |   |   |   |       |     |       |     |     |
|         |      | $\beta 10$                            | $\beta 11$  | $\beta 12$       |              |           |            |           |           |         |       |       |      |       |      |     |       |       |     |   |   |   |   |   |   |   |   |   |   |   |       |     |       |     |     |
| ORF3    | 177: | VLLRI                                 | I           | H-               | LRS          | NP        | DVAP       | MV        | FHG       | SS      | FK    | RL    | TTA  | ----- | 206  |     |       |       |     |   |   |   |   |   |   |   |   |   |   |   |       |     |       |     |     |
| HpaC_St | 126: | IVGEV                                 | IDG         | YQ               | IRD          | N         | FTPL       | V         | Y         | M       | N     | R     | K    | Y     | KL   | SSL | ----- | 156   |     |   |   |   |   |   |   |   |   |   |   |   |       |     |       |     |     |
| HpaC_Tt | 119: | VVGLV                                 | EE-         | VEL              | GEG          | GP        | LV         | F         | Q         | R       | G     | Y     | R    | L     | V    | W   | PS    | ----- | 149 |   |   |   |   |   |   |   |   |   |   |   |       |     |       |     |     |
| PheA2   | 126: | F                                     | I           | G                | E            | V         | T          | D-        | I         | K       | I     | T     | E    | Q     | D-   | P   | L     | F     | F   | S | G | K | Y | H | L | A | Q | N | E | K | V     | E   | T     | S   | 161 |
| TftC    | 148: | I                                     | F           | A                | E            | V         | V          | A-        | R         | N       | H     | A     | E    | E     | C    | T   | P     | L     | I   | H | R | R | Q | Y | A | T | T | R | S | L | A     | E   | ----- | 179 |     |
| CodR    | 145: | L                                     | F           | G                | E            | V         | V          | G-        | L         | S       | S     | H     | A    | E     | E    | E   | A     | L     | I   | Y | L | N | R | R | Y | H | K | L | E | L | ----- | 173 |       |     |     |

2

3 FIG. S1 Comparison of the deduced amino acid sequences of ORF3 and other flavin  
 4 reductases. ORF3 = putative flavin reductase from *Nocardioiodes* sp. PD653; HpaC\_St =  
 5 flavin reductase component of 4-hydroxyphenylacetate 3-monooxygenase from *Sulfolobus*  
 6 *tokodaii* 7 (gi 15621737) (1); HpaC\_Tt = flavin reductase component of  
 7 4-hydroxyphenylacetate 3-monooxygenase from *Thermus thermophilus* HB8 (gi 55772343)  
 8 (2); PheA2 = reductase component of phenol hydroxylase from *Geobacillus*  
 9 *thermoglucosidasius* A7 (gi 15621737) (3); TftC = chlorophenol 4-monooxygenase  
 10 component 1 from *Burkholderia cepacia* (gi 3220029) (4); CodR = corrin reductase from  
 11 *Brucella melitensis* (gi 169791887) (5). Identical residues are marked with asterisks, and  
 12 conserved residues are marked with dots. Residues involved in cofactor binding are labeled in  
 13 bold. Secondary structural elements are highlighted green for  $\beta$ -sheets and red for  $\alpha$ -helices.

14 **Supplemental references**

15

16 1. Okai M, Kudo N, Lee WC, Kamo M, Nagata K, Tanokura M. 2006. Crystal structures of  
17 the short-chain flavin reductase HpaC from *Sulfolobus tokodaii* strain 7 in its three states:  
18 NAD(P)<sup>+</sup>-free, NAD<sup>+</sup>-bound, and NADP<sup>+</sup>-bound. *Biochemistry* 45:5103-5110.  
19 <http://dx.doi.org/10.1021/bi052313i>

20 2. Kim S-H, Hisano T, Takeda K, Iwasaki W, Ebihara A, Miki K. 2007. Crystal structure of  
21 the oxygenase component (HpaB) of the 4-hydroxyphenylacetate 3-monooxygenase from  
22 *Thermus thermophilus* HB8. *J Biol Chem* 282:33107-33117.  
23 <http://dx.doi.org/10.1074/jbc.M703440200>

24 3. van den Heuvel RHH, Westphal AH, Heck AJR, Walsh MA, Rovida S, van Berkel WJH,  
25 Mattevi A. 2003. Structural studies on flavin reductase PheA2 reveal binding of NAD in an  
26 unusual folded conformation and support novel mechanism of action. *J Biol Chem*  
27 279:12860-12867. <http://dx.doi.org/10.1074/jbc.M313765200>

28 4. Webb BN, Ballinger JW, Kim E, Belchik SM, Lam K-S, Youn B, Nissen MS, Xun L, Kang  
29 C. 2009. Characterization of chlorophenol 4-monooxygenase (TftD) and NADH:FAD  
30 oxidoreductase (TftC) of *Burkholderia cepacia* AC1100. *J Biol Chem* 285:2014-2027.  
31 <http://dx.doi.org/10.1074/jbc.M109.056135>

32 5. Lawrence AD, Taylor SL, Scott A, Rowe ML, Johnson CM, Rigby SEJ, Geeves MA,  
33 Pickersgill RW, Howard MJ, Warren MJ. 2014. FAD binding, cobinamide binding and  
34 active site communication in the corrin reductase (CobR). *Biosci Rep* 34:345-355.  
35 <http://dx.doi.org/10.1042/BSR20140060>

36
